# Supplementary material
Source: publisher site journal article supplement (https://www.spandidos-publications.com/8224/downloadSupplementary)
Supplement: Supplementary file 1 [file downloadSupplementary]

**Table SIII.** circRNAs promote the expression and stability of IGF1R by regulating miRNAs.

| <b>circRNAs</b> | <b>miRNAs</b>            | <b>Functions in cancer progression</b>                                                                                                                                                                                                                                                                                                                                                           |
|-----------------|--------------------------|--------------------------------------------------------------------------------------------------------------------------------------------------------------------------------------------------------------------------------------------------------------------------------------------------------------------------------------------------------------------------------------------------|
| Circ_0006174    | miR-940                  | Circ_0006174 enhances radioresistance and tumorigenesis in colorectal cancer by acting as a ceRNA for miR-940, leading to upregulated IGF1R expression. Silencing circ_0006174 sensitizes CRC cells to radiation and suppresses tumor growth both <i>in vitro</i> and <i>in vivo</i> (75).                                                                                                       |
| Circ_PPAPDC1A   | miR-30a-3p               | Circ_PPAPDC1A drives osimertinib resistance in NSCLC by sequestering miR-30a-3p to upregulate IGF1R and activate the PI3K/AKT/mTOR pathway. Targeting this circRNA reverses therapeutic resistance and presents a potential strategy for resistant NSCLC management (76).                                                                                                                        |
| Circ-IGF1R      | miR-362-5p               | Circ-IGF1R promotes CRC progression by functioning as a ceRNA that sequesters miR-362-5p, leading to HMGB3 upregulation and subsequent activation of the Wnt/ $\beta$ -catenin signaling pathway. This circRNA-mediated regulatory axis enhances tumor growth, metastasis and glycolytic metabolism, suggesting its potential as both a diagnostic biomarker and therapeutic target in CRC (77). |
| CircVAPA        | miR-377-3p<br>miR-494-3p | CircVAPA drives small cell lung cancer progression through dual sponging of miR-377-3p and miR-494-3p, resulting in IGF1R upregulation and subsequent activation of the PI3K/AKT signaling pathway. Targeting this circRNA enhances the efficacy of IGF1R inhibitors, suggesting a promising combination therapeutic strategy for SCLC treatment (78).                                           |
| Circ_0067835    | miR-296-5p               | Circ_0067835 enhances CRC radioresistance by functioning as a ceRNA that sequesters miR-296-5p, leading to increased IGF1R expression and subsequent reduction in radiation-induced apoptosis. Therapeutic targeting of this circRNA-mediated pathway represents a promising strategy to overcome radioresistance in patients with CRC (79).                                                     |
| CircRNF13       | miR-139-5p               | CircRNF13 drives pancreatic cancer progression by functioning as a molecular sponge for miR-139-5p, leading to subsequent upregulation of IGF1R expression and enhanced tumor cell proliferation, migration, and invasion. This circRNA-mediated regulatory mechanism represents a potential therapeutic target for intervention in IGF1R-driven pancreatic cancer malignancies (80).            |
| Circ_0002577    | miR-625-5p               | circRNA hsa_circ_0002577 promotes endometrial cancer progression by functioning as a ceRNA that sequesters miR-625-5p, leading to IGF1R upregulation                                                                                                                                                                                                                                             |

|              |            |                                                                                                                                                                                                                                                                                                                                               |
|--------------|------------|-----------------------------------------------------------------------------------------------------------------------------------------------------------------------------------------------------------------------------------------------------------------------------------------------------------------------------------------------|
|              |            | and subsequent activation of the PI3K/Akt signaling pathway. This circRNA-mediated regulatory mechanism represents a promising diagnostic biomarker and therapeutic target for endometrial cancer intervention (81).                                                                                                                          |
| CircGNB1     | miR-141-5p | circGNB1 promotes TNBC progression by functioning as a competitive endogenous RNA that sequesters miR-141-5p, leading to IGF1R upregulation and enhanced tumor growth and metastasis. This circRNA-mediated regulatory mechanism represents both a potential prognostic biomarker and therapeutic target for TNBC treatment (82).             |
| Circ_0006089 | miR-143-3p | Circ_0006089 promotes gastric cancer progression by functioning as a ceRNA that sequesters miR-143-3p, leading to subsequent upregulation of IGF1R expression and enhanced tumor proliferation, migration and invasion. This circRNA-mediated regulatory axis represents a promising therapeutic target for gastric cancer intervention (83). |

---

IGF1R, insulin-like growth factor 1 receptor; circRNA, circular RNA; miR/miRNA, microRNA; ceRNA, competing endogenous RNA; CRC, colorectal cancer; NSCLC< non-small cell lung cancer; TNBC, triple-negative breast cancer.
